# Supplementary material for: Abdominal Obesity-Related Disturbance of Insulin Sensitivity Is Associated with CD8+ EMRA Cells in the Elderly
Source: MDPI journal article supplement (doi:10.3390/cells10050998), 2021-04-23
Supplement: s1 [file s1]

**Table S1.** T cell subpopulations (mean  $\pm$  SD) of all participants.

| T cell subpopulations              |                   |
|------------------------------------|-------------------|
| CD4/CD8 ratio                      | 3.96 $\pm$ 2.45   |
| <b>CD4+ T cells [% CD3+]</b>       | 70.78 $\pm$ 9.86  |
| naïve cells [% CD4+]               | 41.35 $\pm$ 14.49 |
| Central Memory cells [% CD4+]      | 39.98 $\pm$ 9.31  |
| Effector Memory cells [% CD4+]     | 17.12 $\pm$ 8.19  |
| EMRA cells [% CD4+]                | 1.71 $\pm$ 1.41   |
| <b>CD8+ T cells [% CD3+]</b>       | 22.33 $\pm$ 8.94  |
| naïve cells [% CD8+]               | 27.14 $\pm$ 16.38 |
| Central Memory cells [% CD8+]      | 3.39 $\pm$ 2.45   |
| Effector Memory cells [% CD8+]     | 43.77 $\pm$ 14.63 |
| EMRA cells [% CD8+]                | 25.76 $\pm$ 15.91 |
| <b>Regulatory T cells [% CD3+]</b> | 6.05 $\pm$ 1.65   |

**Table S2.** Cytokine and adipokine levels (mean  $\pm$  SD) of all participants.

| Cytokines/adipokines       |                     |
|----------------------------|---------------------|
| CX3CL1/Fractalkine [pg/ml] | 4116.9 $\pm$ 249.5  |
| IL-1 $\beta$ [pg/ml]       | 2.34 $\pm$ 2.40     |
| IL-1ra [pg/ml]             | 360.20 $\pm$ 338.36 |
| IL-6 [pg/ml]               | 1.22 $\pm$ 1.38     |
| IL-10 [pg/ml]              | 0.48 $\pm$ 0.42     |
| IL-15 [pg/ml]              | 2.30 $\pm$ 2.50     |
| TNF- $\alpha$ [pg/ml]      | 2.56 $\pm$ 1.59     |
| Adiponectin [pg/ml]        | 39.98 $\pm$ 9.31    |
| Resitin [pg/ml]            | 17.12 $\pm$ 8.19    |

**Table S3.** Tryptophan metabolites (mean  $\pm$  SD) of all participants.

| Tryptophan metabolites               |                    |
|--------------------------------------|--------------------|
| Tryptophan (TRP) [ $\mu$ mol/L]      | 50.23 $\pm$ 15.11  |
| Kynurenine (KYN) [ $\mu$ mol/L]      | 1.36 $\pm$ 0.38    |
| Quinolinic acid (QA) [ $\mu$ mol/L]  | 0.42 $\pm$ 0.11    |
| Kynurenic acid (KYNA) [ $\mu$ mol/L] | 0.033 $\pm$ 0.013  |
| KYN/TRP                              | 0.028 $\pm$ 0.009  |
| QA/KYN                               | 0.323 $\pm$ 0.075  |
| KYNA/KYN                             | 0.025 $\pm$ 0.007  |
| QA/KA                                | 14.029 $\pm$ 6.674 |
